# Supplementary material
Source: PubMed Central journal article supplement (PMC6301091)

Supplementary Figure 1. Bland Altman plot for in-bed time by log and by *Actigraph Algorithm*.

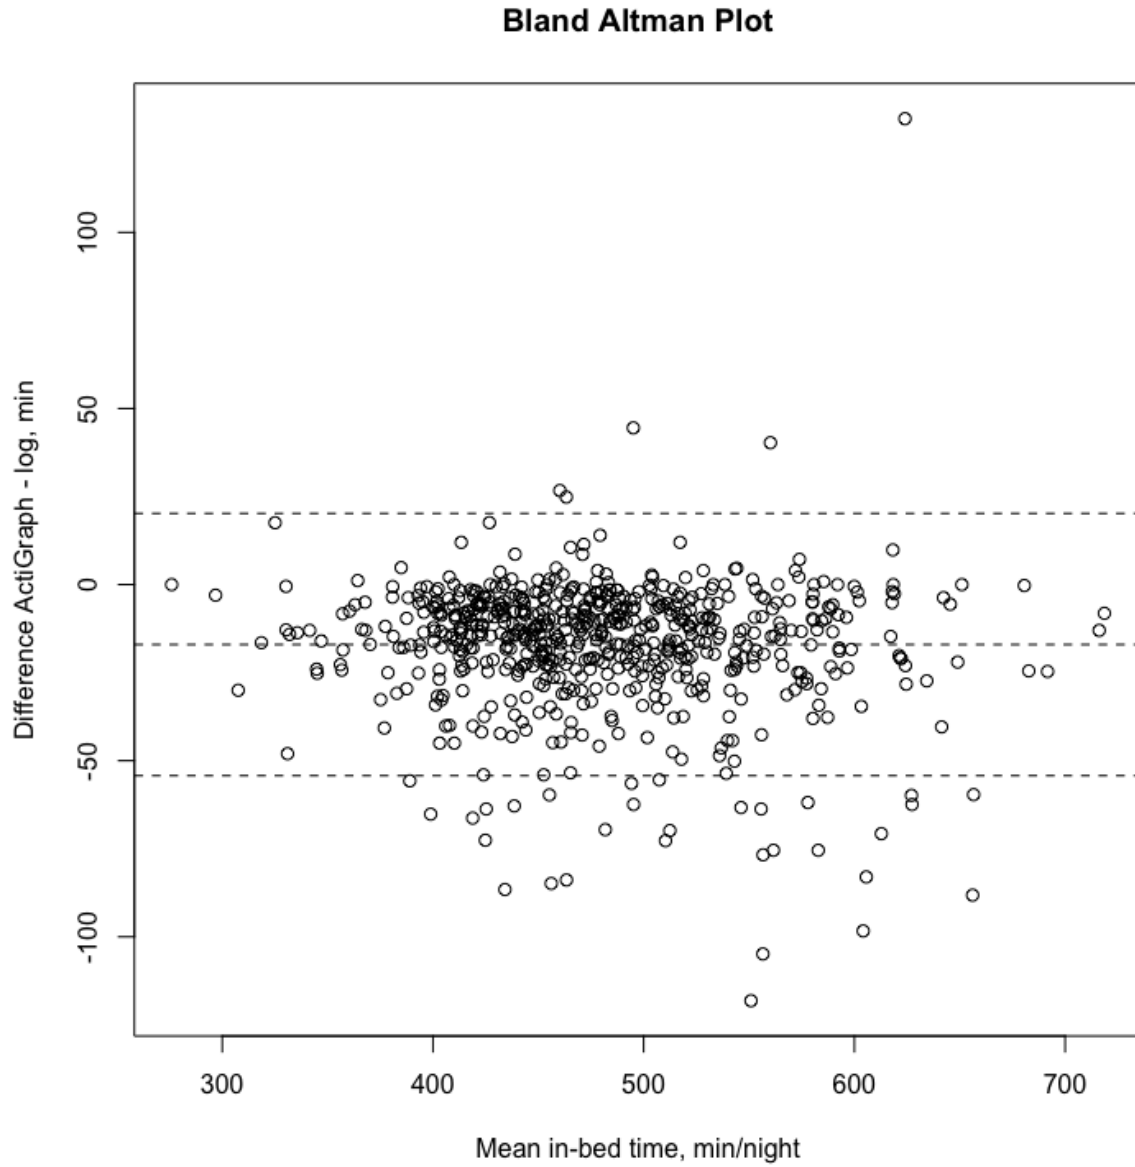

Supplement: NIHMS995447-supplement-1.pdf [file NIHMS995447-supplement-1.pdf]
